**DECISION OF DIRECTOR OF VIET DUC HOSPITAL**

***On: Approval for the implementation of the 2020 institutional-level scientific research projects in the Viet Duc Hospital***

**DIRECTOR OF VIET DUC HOSPITAL**

- Pursuant to Decision No. 1184/QĐ-BYT dated 29 March 2019 by the Minister of Health about issuing the Regulation of Organization and Operation of Viet Duc Hospital;
- Pursuant to the meeting dated 27 March 2020 of Standing Board of the Scientific Committee and Ethics Committee in Viet Duc Hospital;
- Based on request of the Head of Scientific Research Department - Viet Duc Hospital.

**IT IS TO DECIDE**

**Article I:** To approve 112 institutional-level scientific research projects in the Viet Duc Hospital, including:

1. 30 scientific research projects regarding neurology, anesthesia and critical care medicine, laboratory, and other fields
2. 33 scientific research projects regarding cardiology, trauma
3. 19 scientific research projects regarding gastroenterology, urology
4. 30 scientific research projects regarding medical nursing

*A list of the 2020 institutional-level scientific research projects is attached to this decision.*

**Article II:** The Head of research will be responsible for implementing and submitting for approval of the research on schedule as approved and complying with the state regulations on technology agreements and financial expenditure.

**Article III:** Heads of Scientific Research Department, Integrated Planning Department, Finance-Accounting Department, Leaders of relevant units and the head of each scientific research project above in Article I take responsibilities to implement this Decision. This Decision takes effect from the signing date./.

**DIRECTOR OF VIET DUC HOSPITAL**

**Recipients:**

- As Article III;
- Saved at Scientific Research and Information Technology Department;
- Archived at managerial administration (archival division).

**Prof. Tran Binh Giang, MD., PhD.**

**MINISTRY OF HEALTH  
VIET DUC HOSPITAL**

**THE LIST OF THE 2020 INSTITUTIONAL-LEVEL SCIENTIFIC RESEARCH PROJECTS  
IN THE VIET DUC HOSPITAL**

*(Decision No. 818/QĐ–VĐ dated May 4, 2020 by Director of Viet Duc Hospital is attached to this list)*

| <b>No.</b> | <b>Research code</b> | <b>Title</b>                                                                                                                                  | <b>Head of scientific<br/>research project/<br/>implementing unit</b> | <b>Duration of<br/>research project</b>     | <b>Expenditure</b> |
|------------|----------------------|-----------------------------------------------------------------------------------------------------------------------------------------------|-----------------------------------------------------------------------|---------------------------------------------|--------------------|
|            |                      |                                                                                                                                               |                                                                       |                                             |                    |
| 1          |                      |                                                                                                                                               |                                                                       |                                             |                    |
| 2          |                      |                                                                                                                                               |                                                                       |                                             |                    |
| 3          |                      |                                                                                                                                               |                                                                       |                                             |                    |
| 4          | KH04.2020            | Study on the prognostic value of PAASH grading scale and factors relating to poor outcome on patients with aneurysmal subarachnoid hemorrhage | Ngo Manh Hung/<br>Department of<br>Neurosurgery II                    | From September<br>2019 to<br>September 2020 | 5,000,000 VND      |
| 5          |                      |                                                                                                                                               |                                                                       |                                             |                    |
| 6          |                      |                                                                                                                                               |                                                                       |                                             |                    |
| 7          |                      |                                                                                                                                               |                                                                       |                                             |                    |
| 8          |                      |                                                                                                                                               |                                                                       |                                             |                    |
| 9          |                      |                                                                                                                                               |                                                                       |                                             |                    |



Số: 818/QĐ – VĐ

Hà nội, ngày 04 tháng 5 năm 2020

## QUYẾT ĐỊNH

**Phê duyệt triển khai đề tài khoa học công nghệ cấp cơ sở năm 2020  
tại Bệnh viện Hữu nghị Việt Đức**

### GIÁM ĐỐC BỆNH VIỆN HỮU NGHỊ VIỆT ĐỨC

Căn cứ Quyết định số 1184/QĐ – BYT ngày 29/3/2019 của Bộ trưởng Bộ Y tế về việc ban hành Quy chế tổ chức và hoạt động của Bệnh viện HN Việt Đức trực thuộc Bộ Y tế;

Căn cứ Biên bản họp Hội đồng KHCN xét duyệt đề cương đề tài cơ sở năm 2020 ngày 27/3/2020;

Căn cứ Bản hoàn thiện đề cương đề tài cấp cơ sở năm 2020;

Xét đề nghị của Trưởng phòng Nghiên cứu khoa học

### QUYẾT ĐỊNH:

**Điều 1:** Phê duyệt triển khai 112 đề tài khoa học công nghệ cấp cơ sở năm 2020 tại Bệnh viện Hữu nghị Việt Đức. Gồm:

- 30 đề tài thuộc chuyên ngành Thần kinh, Gây mê hồi sức, Cận lâm sàng và một số lĩnh vực khác.
- 33 đề tài thuộc chuyên ngành Tim mạch, Chấn thương.
- 19 đề tài thuộc chuyên ngành Tiêu hóa, Tiết niệu.
- 30 đề tài thuộc chuyên ngành Điều dưỡng.

*Danh sách đề tài KHCN cấp cơ sở thực hiện năm 2020 đính kèm theo Quyết định này.*

**Điều 2:** Chủ nhiệm đề tài và nhóm nghiên cứu có trách nhiệm triển khai nghiên cứu đề tài theo đúng Thuyết minh đề tài đã được Giám đốc phê duyệt; tuân thủ các quy định của Nhà nước, Bộ Y tế và Bệnh viện HN Việt Đức về quản lý, tổ chức, thực hiện đề tài khoa học công nghệ; quyết toán kinh phí phù hợp với nội dung chi và đảm bảo đúng tiến độ.

**Điều 3:** Các ông (bà) Trưởng phòng NCKH, KHTH, TCKT, Lãnh đạo đơn vị thực hiện nghiên cứu đề tài, Chủ nhiệm đề tài chịu trách nhiệm thi hành Quyết định này.

**Nơi nhận:**

- Như điều 3;
- Lưu VT, NCKH.

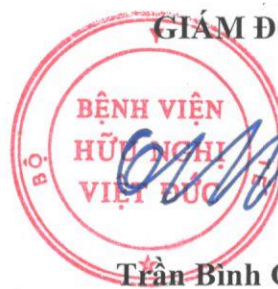

GIÁM ĐỐC

Trần Bình Giang

**DANH SÁCH ĐỀ TÀI KHCN CẤP CƠ SỞ THỰC HIỆN TẠI BỆNH VIỆN HỮU NGHỊ VIỆT ĐỨC NĂM 2020**  
(Kèm theo Quyết định số 818/QĐ-VĐ ngày 04/5/2020 của Giám đốc bệnh viện)

| STT                                                                       | Mã số đề tài | Tên đề tài                                                                                                                                                                 | Chủ nhiệm đề tài/<br>Đơn vị thực hiện                               | Thời gian thực hiện | Kinh phí từ nguồn bệnh viện |
|---------------------------------------------------------------------------|--------------|----------------------------------------------------------------------------------------------------------------------------------------------------------------------------|---------------------------------------------------------------------|---------------------|-----------------------------|
| <b>CHUYÊN NGÀNH THẦN KINH, GMHS, CẬN LÂM SÀNG VÀ MỘT SỐ LĨNH VỰC KHÁC</b> |              |                                                                                                                                                                            |                                                                     |                     |                             |
| 1                                                                         | KH01.2020    | Đánh giá kết quả phẫu thuật đặt điện cực kích thích não sâu điều trị bệnh lý Parkinson vô căn tại Bệnh viện Việt Đức                                                       | Đồng Văn Hè, Trần Đình Văn/<br>Khoa PT Thần kinh I                  | T4/2020 – T4/2021   | 05 triệu đồng               |
| 2                                                                         | KH02.2020    | Đánh giá kết quả xa sau điều trị vi phẫu thuật giải ép mạch máu thần kinh trong chứng co giật nửa mặt                                                                      | Dương Đại Hà/<br>Khoa PT Thần kinh I                                | T4/2020 – T4/2021   | 05 triệu đồng               |
| 3                                                                         | KH03.2020    | Đánh giá kết quả áp dụng chụp cộng hưởng từ 3.0 Tesla xác định bó tháp trong phẫu thuật u não vùng chức năng tại Bệnh viện Việt Đức                                        | Dương Đại Hà/<br>Khoa PT Thần kinh I                                | T4/2020 – T4/2021   | 05 triệu đồng               |
| 4                                                                         | KH04.2020    | Nghiên cứu giá trị tiên lượng của thang điểm PAASH và một số yếu tố liên quan tới kết cục chức năng thần kinh xấu ở bệnh nhân chảy máu dưới nhện do vỡ phình động mạch não | Ngô Mạnh Hùng/<br>PT Thần kinh II                                   | T09/2019 – T9/2020  | 05 triệu đồng               |
| 5                                                                         | KH05.2020    | Đánh giá chất lượng cuộc sống của người bệnh mắc bệnh động kinh tại khoa Nội – Hồi sức Thần kinh, BV HN Việt Đức năm 2020                                                  | Nguyễn Anh Tuấn/<br>Khoa Nội – Hồi sức thần kinh,<br>BV HN Việt Đức | T1/2020 – T12/2020  | 05 triệu đồng               |
| 6                                                                         | KH06.2020    | Đặc điểm lâm sàng và điện sinh lý trong tổn thương thần kinh quay                                                                                                          | Nguyễn Anh Tuấn/<br>Khoa Nội – Hồi sức thần kinh,<br>BV HN Việt Đức | T3/2020 – T3/2021   | 05 triệu đồng               |
| 7                                                                         | KH07.2020    | Đánh giá sự hiểu biết của người bệnh ngoại khoa về chuyên ngành gây mê hồi sức                                                                                             | Nguyễn Thị Thúy Ngân/<br>Khoa Gây mê I, Trung tâm GMHS              | T4/2020 – T4/2021   | 05 triệu đồng               |
| 8                                                                         | KH08.2020    | Gây mê cho ghép hai phổi có ECMO hỗ trợ                                                                                                                                    | Trịnh Kế Điệp,<br>Nguyễn Thị Thúy Ngân/<br>Trung tâm GMHS           | T4/2020 – T4/2021   | 05 triệu đồng               |
| 9                                                                         | KH09.2020    | So sánh hiệu quả vô cảm, giảm đau sau mổ của levobupivacain với ropivacain trong phong bế liên tục đám rối thần kinh cánh tay đường nách có siêu âm hướng dẫn              | Nguyễn Đắc Thanh/<br>Khoa Gây mê I                                  | T4/2020 – T10/2020  | 05 triệu đồng               |



|    |           |                                                                                                                                                   |                                                                                            |                        |               |
|----|-----------|---------------------------------------------------------------------------------------------------------------------------------------------------|--------------------------------------------------------------------------------------------|------------------------|---------------|
| 10 | KH10.2020 | Đánh giá ảnh hưởng của dung dịch tinh thể cân bằng Ringerfundin lên tình trạng điện giải, toan kiềm và chức năng thận giai đoạn sớm sau ghép thận | Trịnh Thị Thom,<br>Nguyễn Thị Thu Yến,<br>Nguyễn Thị Nhâm/<br>Khoa GMHS 2,<br>TT Gây mê HS | T2/2020 –<br>T10/2020  | 05 triệu đồng |
| 11 | KH11.2020 | Đánh giá hiệu quả của Ondansetron liều 8mg trong dự phòng, một số tác dụng không mong muốn của gây tê tủy sống trong phẫu thuật chi dưới          | Hoàng Thị Thu Hà/<br>TT Gây mê Hồi sức                                                     | T3/2020 –<br>T9/2020   | 05 triệu đồng |
| 12 | KH12.2020 | Đánh giá hiệu quả giải giãn cơ Sugamadex so với Neostigmin trong phẫu thuật nội soi u tuyến thượng thận                                           | Phạm Thị Văn Anh,<br>Trịnh Xuân Khánh/<br>Khoa GMHS 2,<br>TT Gây mê HS                     | T7/2019 –<br>T7/2020   | 05 triệu đồng |
| 13 | KH13.2020 | Tình hình tai nạn giao thông liên quan đến sử dụng rượu bia sau một năm thực hiện Nghị định 100 của Thủ tướng chính phủ                           | Ngô Xuân Tiếp,<br>Phạm Hải Bằng/<br>Khoa Khám bệnh                                         | T01/2020 –<br>T02/2021 | 05 triệu đồng |
| 14 | KH14.2020 | Khảo sát thực trạng chuyển viện từ bệnh viện tuyến dưới đến khoa Cấp cứu Bệnh viện HN Việt Đức năm 2020                                           | Ngô Xuân Tiếp,<br>Phạm Hải Bằng/<br>Khoa Khám bệnh                                         | T05/2020 –<br>T11/2020 | 05 triệu đồng |
| 15 | KH15.2020 | Nghiên cứu đặc điểm hình ảnh cộng hưởng từ cột sống và đánh giá hiệu quả phương pháp phong bế điều trị đau rễ thần kinh thắt lưng cùng            | Nguyễn Đình Minh,<br>Dương Anh Dũng/<br>Khoa Chẩn đoán hình ảnh                            | T3/2020 –<br>T9/2020   | 05 triệu đồng |
| 16 | KH16.2020 | Nghiên cứu đặc điểm hình ảnh và giá trị của cộng hưởng từ trong chẩn đoán u trong ống sống                                                        | Trịnh Anh Tuấn,<br>Nguyễn Đình Minh/<br>Khoa Chẩn đoán hình ảnh                            | T02/2020 –<br>T10/2020 | 05 triệu đồng |
| 17 | KH17.2020 | Đánh giá kết quả chụp cộng hưởng từ động học sản chậu ở người trưởng thành không triệu chứng                                                      | Nguyễn Ngọc Ánh,<br>Nguyễn Thị Mến/<br>TT PT ĐTT và TSM                                    | T4/2020 –<br>T7/2020   | 05 triệu đồng |
| 18 | KH18.2020 | Phân tích tình hình báo cáo phản ứng có hại của thuốc tại Bệnh viện HN Việt Đức giai đoạn 2014 – 2019                                             | Đàm Mai Hương/<br>Khoa Dược                                                                | T2/2020 –<br>T2/2021   | 05 triệu đồng |
| 19 | KH19.2020 | Đánh giá kết quả xây dựng danh mục tương tác thuốc cần chú ý trong thực hành lâm sàng tại bệnh viện HN Việt Đức                                   | Nguyễn Thanh Hiền/<br>Khoa Dược                                                            | T1/2020 –<br>T12/2020  | 05 triệu đồng |

|    |           |                                                                                                                                                                         |                                                          |                        |               |
|----|-----------|-------------------------------------------------------------------------------------------------------------------------------------------------------------------------|----------------------------------------------------------|------------------------|---------------|
| 20 | KH20.2020 | Phân loại carbapenemase và tìm hiểu kiểu cách đề kháng của các chủng <i>Klebsiella pneumoniae</i> kháng carbapenemase tại khoa Hồi sức tích cực – Bệnh viện HN Việt Đức | Trần Hải Yến/<br>Khoa Vi sinh                            | T4/2020 –<br>T5/2021   | 05 triệu đồng |
| 21 | KH21.2020 | Nhận xét đặc điểm mô gân động loài được bảo quản lạnh sâu tại Ngân hàng Mô – Bệnh viện HN Việt Đức từ tháng 3/2018 đến tháng 3/2020                                     | Trần Thị Hằng,<br>Dương Công Nguyên/<br>Ngân hàng Mô     | T4/2020 –<br>T9/2020   | 05 triệu đồng |
| 22 | KH22.2020 | Đặc điểm mô xương sọ tự thân được bảo quản lạnh sâu tại Ngân hàng Mô – Bệnh viện Hữu nghị Việt Đức từ tháng 3/2018 đến tháng 3/2020                                     | Trần Thị Hằng/<br>Ngân hàng Mô                           | T3/2020 –<br>T10/2020  | 05 triệu đồng |
| 23 | KH23.2020 | Tình trạng dinh dưỡng cán bộ công nhân viên Bệnh viện Hữu nghị Việt Đức năm 2019                                                                                        | Đỗ Tất Thành/<br>Khoa Dinh Dưỡng                         | T10/2019 –<br>T10/2020 | 05 triệu đồng |
| 24 | KH24.2020 | Nghiên cứu xây dựng giả ghép gan                                                                                                                                        | Trịnh Hồng Sơn,<br>Đỗ Thu Hà/<br>Phòng Tài chính Kế toán | T3/2020 –<br>T6/2020   | 10 triệu đồng |
| 25 | KH25.2020 | Quy trình giải quyết chế độ BHYT cho người bệnh cấp cứu vào điều trị nội trú                                                                                            | Lê Minh Thu,<br>Đỗ Thu Hà/<br>Phòng Tài chính kế toán    | T5/2020 –<br>T5/2021   | 10 triệu đồng |
| 26 | KH26.2020 | Ứng dụng công nghệ thông tin trong quản lý hồ sơ cán bộ viên chức, người lao động                                                                                       | Nguyễn Mạnh Khánh/<br>Phòng Tổ chức cán bộ               | T4/2020 –<br>T3/2021   | 10 triệu đồng |
| 27 | KH27.2020 | Thực trạng nhiễm khuẩn vết mổ và một số yếu tố liên quan tại các khoa Chấn thương chỉnh hình bệnh viện Việt Đức năm 2020                                                | Lê Tư Hoàng/<br>Phòng Quản lý chất lượng                 | T7/2020 –<br>T9/2020   | 05 triệu đồng |
| 28 | KH28.2020 | Khảo sát sự hài lòng và một số yếu tố liên quan của người bệnh nội trú tại bệnh viện Hữu nghị Việt Đức năm 2020                                                         | Lê Thị Kim Nhung/<br>Phòng Quản lý chất lượng            | T3/2020 –<br>T7/2020   | 05 triệu đồng |
| 29 | KH29.2020 | Hiệu quả hợp tác y tế với một số bệnh viện Đài Loan 2018 - 2019                                                                                                         | Nguyễn Đức Chính/<br>Phòng Hợp tác quốc tế               | T3/2020 –<br>T3/2021   | 05 triệu đồng |
| 30 | KH30.2020 | Nghiên cứu thực trạng và đề xuất giải pháp triển khai công tác hỗ trợ người bệnh khám theo yêu cầu tại Bệnh viện HN Việt Đức                                            | Nguyễn Trọng Sơn/<br>Phòng Công tác xã hội               | T4/2020 –<br>T4/2021   | 05 triệu đồng |



# CHUYÊN NGÀNH TIM MẠCH, CHẨN THƯƠNG

| STT | Mã số đề tài | Tên đề tài                                                                                                                                                                     | Chủ nhiệm đề tài/<br>Đơn vị thực hiện                                    | Thời gian thực hiện    | Kinh phí từ nguồn bệnh viện |
|-----|--------------|--------------------------------------------------------------------------------------------------------------------------------------------------------------------------------|--------------------------------------------------------------------------|------------------------|-----------------------------|
| 1   | CT01.2020    | Kết quả ứng dụng của siêu âm tim cho bệnh nhân trước và sau ghép tim                                                                                                           | Nguyễn Hữu Ước,<br>Khổng Tiến Bình/<br>TT Tim mạch và LN                 | T01/2020 –<br>T11/2020 | 05 triệu đồng               |
| 2   | CT02.2020    | Ứng dụng kỹ thuật nội soi phế quản trong ghép phổi từ người cho chết não tại Bệnh viện Hữu nghị Việt Đức                                                                       | Nguyễn Hữu Ước,<br>Vũ Văn Thời/<br>TT Tim mạch và LN                     | T01/2020 –<br>T12/2020 | 05 triệu đồng               |
| 3   | CT03.2020    | Kết quả ứng dụng phương pháp cố định xương sườn gây bằng nẹp vis tại bệnh viện Hữu nghị Việt Đức                                                                               | Nguyễn Hữu Ước,<br>Nguyễn Việt Anh/<br>TT Tim mạch và LN                 | T01/2020 –<br>T10/2020 | 05 triệu đồng               |
| 4   | CT04.2020    | Kết quả ứng dụng phương pháp Hybrid điều trị bệnh lý động mạch chủ                                                                                                             | Nguyễn Hữu Ước,<br>Nguyễn Tùng Sơn/<br>TT Tim mạch và LN                 | T01/2020 –<br>T10/2020 | 10 triệu đồng               |
| 5   | CT05.2020    | Kết quả bước đầu trong hồi sức tích cực, điều trị và theo dõi sau ghép phổi tại Trung tâm Tim mạch và Lồng ngực, BV HN Việt Đức                                                | Phạm Tiến Quân/<br>Khoa HSTC Tim mạch và LN,<br>TT Tim mạch và LN        | T1/2020 –<br>T12/2020  | 05 triệu đồng               |
| 6   | CT06.2020    | Nghiên cứu ứng dụng các khuyến cáo phòng ngừa viêm phổi thở máy ở bệnh nhân sau mổ tim hở tại khoa HSTC Tim mạch và Lồng ngực, TT Tim mạch và Lồng ngực, Bệnh viện HN Việt Đức | Phạm Tiến Quân/<br>Khoa HSTC Tim mạch và LN,<br>TT Tim mạch và Lồng ngực | T1/2020 –<br>T12/2020  | 05 triệu đồng               |
| 7   | CT07.2020    | Kết quả phẫu thuật điều trị u tuyến ức tại Bệnh viện HN Việt Đức giai đoạn 2016 – 2020                                                                                         | Phạm Hữu Lư/<br>TT Tim mạch và Lồng ngực                                 | T4/2020 –<br>T4/2021   | 05 triệu đồng               |
| 8   | CT08.2020    | Kết quả điều trị ung thư phổi không tế bào nhỏ bằng phẫu thuật nội soi tại Bệnh viện Hữu nghị Việt Đức                                                                         | Phạm Hữu Lư/<br>TT Tim mạch và Lồng ngực                                 | T4/2020 –<br>T4/2021   | 05 triệu đồng               |
| 9   | CT09.2020    | Kết quả phẫu thuật đóng thông liên nhĩ ít xâm lấn qua đường mổ ngực phải không ngừng tim tại bệnh viện Hữu nghị Việt Đức                                                       | Phùng Duy Hồng Sơn/<br>TT Tim mạch và Lồng ngực                          | T3/2020 –<br>T12/2020  | 05 triệu đồng               |
| 10  | CT10.2020    | Kết quả điều trị chấn thương động mạch khoeo tại Bệnh viện Hữu nghị Việt Đức.                                                                                                  | Nguyễn Hữu Ước,<br>Dương Ngọc Thắng/<br>Khoa PT Tim mạch và LN           | T02/2020 –<br>T10/2020 | 05 triệu đồng               |



|    |           |                                                                                                                         |                                                                 |                        |               |
|----|-----------|-------------------------------------------------------------------------------------------------------------------------|-----------------------------------------------------------------|------------------------|---------------|
| 11 | CT11.2020 | Kết quả ứng dụng phương pháp can thiệp nhiệt nội mạch bằng Laser trong điều trị bệnh lý suy van tĩnh mạch nông chi dưới | Lê Nhật Tiên,<br>Nguyễn Hữu Ước/<br>TT Tim mạch và LN           | T01/2020 –<br>T10/2020 | 05 triệu đồng |
| 12 | CT12.2020 | Đánh giá kết quả nội soi khâu chóp xoay khớp vai bằng kỹ thuật hai hàng.                                                | Nguyễn Mạnh Khánh,<br>Luu Danh Huy/<br>Khoa PT Chi trên và YHTT | T4/2020 –<br>T4/2021   | 05 triệu đồng |
| 13 | CT13.2020 | Đánh giá kết quả điều trị trật cùng đòn sử dụng Tightrope.                                                              | Nguyễn Mạnh Khánh,<br>Đỗ Văn Hải/<br>Khoa PT Chi trên và YHTT   | T4/2020 –<br>T4/2021   | 05 triệu đồng |
| 14 | CT14.2020 | Kết quả phẫu thuật thay khớp liên đốt gần bàn tay điều trị di chứng sau chấn thương, vết thương bàn tay                 | Nguyễn Mạnh Khánh,<br>Đỗ Văn Hải/<br>Khoa PT Chi trên và YHTT   | T4/2020 –<br>T4/2021   | 05 triệu đồng |
| 15 | CT15.2020 | Đánh giá kết quả thay khớp háng toàn phần không xi măng hai chuyển động                                                 | Nguyễn Mạnh Khánh,<br>Đỗ Vũ Anh/<br>Khoa PT Chi trên và YHTT    | T4/2020 –<br>T4/2021   | 05 triệu đồng |
| 16 | CT16.2020 | Kết quả điều trị trật đai quay trong gãy cũ monteggia trẻ em.                                                           | Luu Danh Huy,<br>Phạm Ngọc Đình/<br>Khoa PT Chi trên và YHTT    | T4/2020 –<br>T4/2021   | 05 triệu đồng |
| 17 | CT17.2020 | Đánh giá kết quả phẫu thuật chuyển gân duỗi riêng ngón II cho duỗi dài ngón I trong tổn thương đến muốn.                | Luu Danh Huy,<br>Nguyễn Mộc Sơn/<br>Khoa PT Chi trên và YHTT    | T4/2020 –<br>T4/2021   | 05 triệu đồng |
| 18 | CT18.2020 | Nghiên cứu ứng dụng phẫu thuật đường bên (XLIF) điều trị vẹo cột sống thắt lưng do thoái hóa                            | Đinh Ngọc Sơn/<br>Khoa Phẫu thuật Cột sống                      | T4/2020 –<br>T4/2021   | 05 triệu đồng |
| 19 | CT19.2020 | Kết quả phẫu thuật nội soi giải ép điều trị bệnh lý hẹp ống sống thắt lưng.                                             | Vũ Văn Cường /<br>Khoa Phẫu thuật Cột sống                      | T02/2020 –<br>T02/2021 | 05 triệu đồng |
| 20 | CT20.2020 | Nghiên cứu ứng dụng Robot định vị chính xác hỗ trợ trong phẫu thuật chỉnh vẹo cột sống vô căn thanh thiếu niên.         | Nguyễn Hoàng Long/<br>Khoa PT Cột sống                          | T4/2020 –<br>T10/2020  | 05 triệu đồng |
| 21 | CT21.2020 | Nghiên cứu ứng dụng phẫu thuật nội soi lỗ liên hợp điều trị thoát vị đĩa đệm cột sống thắt lưng di trú.                 | Đỗ Mạnh Hùng/<br>Khoa PT Cột sống                               | T4/2020 –<br>T4/2021   | 05 triệu đồng |

|    |           |                                                                                                                                                                                                        |                                                                        |                     |               |
|----|-----------|--------------------------------------------------------------------------------------------------------------------------------------------------------------------------------------------------------|------------------------------------------------------------------------|---------------------|---------------|
| 22 | CT22.2020 | Kết quả tạo hình tai do dị tật tai nhỏ bẩm sinh bằng chất liệu nhân tạo Polyethylene.                                                                                                                  | Nguyễn Hồng Hà/<br>Khoa PT Hàm mặt – Tạo hình – Thăm mỹ                | T4/2020 – T8/2020   | 10 triệu đồng |
| 23 | CT23.2020 | Nghiên cứu ứng dụng nẹp vít tự tiêu trong điều trị gãy xương hàm mặt.                                                                                                                                  | Vũ Trung Trực/<br>Khoa PT Hàm mặt – Tạo hình – Thăm mỹ                 | T3/2020 – T4/2021   | 05 triệu đồng |
| 24 | CT24.2020 | Đánh giá kết quả ứng dụng nội soi hỗ trợ trong phẫu thuật chấn thương hàm mặt.                                                                                                                         | Đào Văn Giang/<br>Khoa PT Hàm mặt – Tạo hình – Thăm mỹ                 | T3/2020 – T10/2020  | 05 triệu đồng |
| 25 | CT25.2020 | Đánh giá kết quả chuyển thần kinh XI cho thần kinh trên vai trong điều trị liệt đám rối thần kinh cánh tay người lớn.                                                                                  | Đào Văn Giang/<br>Khoa PT Hàm mặt – Tạo hình – Thăm mỹ                 | T3/2020 – T9/2020   | 05 triệu đồng |
| 26 | CT26.2020 | Đánh giá kết quả tạo hình vá vỡ xương sàn hốc mắt sớm thì đầu tại Bệnh viện Việt Đức.                                                                                                                  | Bùi Mai Anh,<br>Vũ Trung Trực/<br>Khoa PT Hàm mặt – Tạo hình – Thăm mỹ | T01/2020 – T02/2021 | 05 triệu đồng |
| 27 | CT27.2020 | Đánh giá kết quả chuyển thần kinh quay cho thần kinh nách trong điều trị liệt đám rối thần kinh cánh tay không hoàn toàn ở người lớn tại khoa PT Hàm mặt – tạo hình – thăm mỹ - Bệnh viện HN Việt Đức. | Trần Thị Thanh Huyền/<br>Khoa PT Hàm mặt – Tạo hình – Thăm mỹ          | T3/2020 – T10/2020  | 05 triệu đồng |
| 28 | CT28.2020 | Kết quả phục hồi chức năng sau thay khớp vai do gãy phức tạp đầu trên xương cánh tay tại Bệnh viện Việt Đức.                                                                                           | Bùi Duy Hiếu/<br>Khoa Phục hồi chức năng                               | T01/2020 – T10/2020 | 05 triệu đồng |
| 29 | CT29.2020 | Chuẩn bị nền vết thương – vai trò quan trọng trong chăm sóc vết thương nhiễm khuẩn                                                                                                                     | Nguyễn Đức Chính/<br>Khoa PT Nhiễm khuẩn                               | T02/2020 – T5/2020  | 05 triệu đồng |
| 30 | CT30.2020 | Kết quả phẫu thuật nội soi tái tạo dây chằng chéo trước bằng mảnh ghép nửa trước gân cơ mác dài tự thân tại bệnh viện Việt Đức                                                                         | Lê Mạnh Sơn,<br>Nguyễn Văn Phan/<br>Khoa PT chấn thương chung          | T12/2019 – T12/2020 | 0 đồng        |
| 31 | CT31.2020 | Đánh giá kết quả điều trị sau mổ 5 năm với gãy mâm chày Schatzker V, VI bằng nẹp vít khóa tại bệnh viện Việt Đức                                                                                       | Lê Mạnh Sơn,<br>Đặng Trung Kiên/<br>Khoa PT CT chung                   | T5/2020 – T5/2021   | 0 đồng        |
| 32 | CT32.2020 | Kết quả bước đầu chụp cắt lớp trong mổ sử dụng BodyTom hỗ trợ phẫu thuật cột sống ngực thắt lưng cùng                                                                                                  | Nguyễn Lê Bảo Tiến,<br>Đinh Ngọc Sơn/<br>Khoa PT Cột Sống              | T02/2020 – T02/2021 | 0 đồng        |
| 33 | CT33.2020 | Kết quả bước đầu phẫu thuật nội soi hỗ trợ cố định cột sống, giải ép, ghép xương liên thân đốt qua lỗ liên hợp điều trị bệnh lý cột sống vùng thắt lưng cùng                                           | Nguyễn Lê Bảo Tiến,<br>Võ Văn Thanh/<br>Khoa PT Cột sống               | T2/2020 – T2/2021   | 0 đồng        |



# CHUYÊN NGÀNH TIÊU HÓA – TIẾT NIỆU

| STT | Mã số đề tài | Tên đề tài                                                                                                                                                        | Chủ nhiệm đề tài/<br>Đơn vị thực hiện                                | Thời gian thực hiện    | Kinh phí từ nguồn bệnh viện |
|-----|--------------|-------------------------------------------------------------------------------------------------------------------------------------------------------------------|----------------------------------------------------------------------|------------------------|-----------------------------|
| 1   | TH01.2020    | Nghiên cứu kết quả phẫu thuật cắt toàn bộ tuyến tiền liệt điều trị ung thư tuyến tiền liệt ở giai đoạn khu trú.                                                   | Trần Chí Thanh/<br>Khoa Điều trị Theo yêu cầu                        | T01/2020 –<br>T12/2020 | 05 triệu đồng               |
| 2   | TH02.2020    | Nghiên cứu đặc điểm tái phát, di căn của ung thư đại trực tràng.                                                                                                  | Hoàng Minh Đức/<br>Khoa Điều trị Theo yêu cầu                        | T3/2020 –<br>T3/2021   | 05 triệu đồng               |
| 3   | TH03.2020    | Khảo sát tình hình mắc rối loạn phát triển giới tính ở người bệnh đến khám và điều trị tại Bệnh viện Hữu nghị Việt Đức                                            | Trần Thị Ngọc Anh,<br>Nguyễn Việt Hoa/<br>Khoa PT Nhi và trẻ sơ sinh | T02/2020 –<br>T11/2020 | 10 triệu đồng               |
| 4   | TH04.2020    | Kết quả nuôi dưỡng người bệnh trước mổ.                                                                                                                           | Phạm Hoàng Hà/<br>Khoa Phẫu thuật Tiêu hóa                           | T3/2020 –<br>T3/2021   | 05 triệu đồng               |
| 5   | TH05.2020    | Kết quả chăm sóc vết mổ nhiễm khuẩn tại khoa Phẫu thuật Tiêu hóa – Bệnh viện Hữu nghị Việt Đức                                                                    | Phạm Hoàng Hà/<br>Khoa Phẫu thuật Tiêu hóa                           | T3/2020 –<br>T3/2021   | 05 triệu đồng               |
| 6   | TH06.2020    | Đánh giá kết quả sớm điều trị viêm phúc mạc ruột thừa bằng phẫu thuật nội soi tại bệnh viện Việt Đức                                                              | Dương Trọng Hiền/<br>Khoa PT Cấp cứu Tiêu hóa                        | T01/2020 –<br>T12/2020 | 05 triệu đồng               |
| 7   | TH07.2020    | Đánh giá kết quả sớm điều trị thoát vị bẹn tái phát bằng phương pháp đặt lưới qua nội soi ổ bụng tại bệnh viện Hữu nghị Việt Đức                                  | Lê Việt Khánh/<br>Khoa PT Cấp cứu Tiêu hóa                           | T01/2020 –<br>T12/2020 | 05 triệu đồng               |
| 8   | TH08.2020    | Tư vấn chăm sóc người bệnh nhiễm HIV/AIDS cho người nhà người bệnh tại Bệnh viện Hữu nghị Việt Đức                                                                | Nguyễn Đức Chinh,<br>Nguyễn Minh Kỳ/<br>Khoa PT Nhiễm khuẩn          | T02/2020 –<br>T7/2020  | 05 triệu đồng               |
| 9   | TH09.2020    | Bóc u phì đại lành tính tuyến tiền liệt nội soi qua đường niệu đạo bằng laser công suất lớn.                                                                      | Đỗ Trường Thành/<br>Phẫu thuật Tiết niệu                             | T4/2020 –<br>T02/2021  | 05 triệu đồng               |
| 10  | TH10.2020    | Đánh giá kết quả sớm phẫu thuật nội soi kết hợp nội soi tán sỏi điện thủy lực điều trị sỏi đường mật ở các bệnh nhân dưới 60 tuổi tại bệnh viện Hữu nghị Việt Đức | Đỗ Tuấn Anh,<br>Mẫn Văn Chung/<br>Khoa PT Gan mật                    | T5/2020 –<br>T9/2020   | 05 triệu đồng               |



|    |           |                                                                                                                                                                                                |                                                                    |                        |               |
|----|-----------|------------------------------------------------------------------------------------------------------------------------------------------------------------------------------------------------|--------------------------------------------------------------------|------------------------|---------------|
| 11 | TH11.2020 | Nghiên cứu áp dụng cắt gan nội soi có kiểm soát cuồng gan toàn bộ tạm thời trong điều trị u gan lành tính tại BV Hữu nghị Việt Đức                                                             | Trần Đình Thơ,<br>Mẫn Văn Chung/<br>Khoa PT Gan mật                | T3/2020 –<br>T7/2020   | 05 triệu đồng |
| 12 | TH12.2020 | Nghiên cứu so sánh đánh giá mức độ xơ gan giữa mô bệnh học với máy siêu âm đo độ đàn hồi nhu mô gan: nghiên cứu đầu tiên tại Việt Nam                                                          | Phạm Gia Anh,<br>Nguyễn Lan Hương/<br>Khoa Ung bướu                | T4/2020 –<br>T4/2021   | 05 triệu đồng |
| 13 | TH13.2020 | Thực hành và kết quả Lọc màng bụng tại khoa Thận – Lọc máu, bệnh viện Hữu nghị Việt Đức                                                                                                        | Nguyễn Thị Thùy /<br>Khoa Thận Lọc máu                             | T4/2020 –<br>T4/2021   | 05 triệu đồng |
| 14 | TH14.2020 | Đánh giá kết quả ghép thận từ người cho chết não sau 10 năm 2010 – 2020 tại Bệnh viện Việt Đức.                                                                                                | Lê Nguyễn Vũ,<br>Nguyễn Quang Nghĩa/<br>Trung tâm Ghép tạng        | T12/2019 –<br>T12/2020 | 05 triệu đồng |
| 15 | TH15.2020 | Cải tiến cách thức lấy thận nội soi để ghép và ứng dụng sử dụng đoạn tĩnh mạch sinh dục kéo dài tĩnh mạch thận trong ghép thận từ người cho sống tại Bệnh viện Việt Đức giai đoạn 2019 – 2020. | Lê Nguyễn Vũ,<br>Ninh Việt Khải/<br>Trung tâm ghép tạng            | T8/2019 –<br>T8/2020   | 05 triệu đồng |
| 16 | TH16.2020 | Kết quả phẫu thuật bệnh rò hậu môn tái phát tại Bệnh viện Hữu nghị Việt Đức.                                                                                                                   | Phạm Phúc Khánh,<br>Nguyễn Ngọc Ánh/<br>TT PT Đại trực tràng – TSM | T01/2020 –<br>T10/2020 | 05 triệu đồng |
| 17 | TH17.2020 | Mô tả đặc điểm lâm sàng, cận lâm sàng và đánh giá kết quả điều trị phẫu thuật bệnh Hirschsprung ở người trưởng thành                                                                           | Lê Nhật Huy,<br>Nguyễn Xuân Hùng/<br>TT PT Đại trực tràng & TSM    | T01/2020 –<br>T01/2021 | 05 triệu đồng |
| 18 | TH18.2020 | Đánh giá rối loạn tình dục ở bệnh nhân cắt dương vật do ung thư tại Trung tâm Nam học, Bệnh viện Hữu nghị Việt Đức                                                                             | Nguyễn Quang/<br>Trung tâm Nam học                                 | T3/2020 –<br>T3/2021   | 05 triệu đồng |
| 19 | TH19.2020 | Đánh giá vai trò của siêu âm Doppler dương vật trong đánh giá tình trạng cương dương vật                                                                                                       | Nguyễn Quang/<br>Trung tâm Nam học                                 | T3/2020 –<br>12/2020   | 05 triệu đồng |

# CHUYÊN NGÀNH ĐIỀU DƯỠNG

| STT | Mã số đề tài | Tên đề tài                                                                                                                                                                                | Chủ nhiệm đề tài/<br>Đơn vị thực hiện                                                 | Thời gian thực hiện | Kinh phí từ nguồn bệnh viện |
|-----|--------------|-------------------------------------------------------------------------------------------------------------------------------------------------------------------------------------------|---------------------------------------------------------------------------------------|---------------------|-----------------------------|
| 1   | ĐD01.2020    | Đánh giá hiệu quả chương trình dự phòng và chăm sóc bí tiểu sau phẫu thuật tại Bệnh viện Hữu nghị Việt Đức năm 2020.                                                                      | Trần Văn Oánh,<br>Nguyễn Thị Chinh/<br>Phòng Điều dưỡng                               | T9/2020 – T03/2021  | 05 triệu đồng               |
| 2   | ĐD02.2020    | Mô tả tỷ lệ bí tiểu trên bệnh nhân sau phẫu thuật và tìm hiểu một số yếu tố ảnh hưởng tới tình trạng bí tiểu sau phẫu thuật tại Bệnh viện HN Việt Đức năm 2020.                           | Bùi Thị Kim Nhung,<br>Nguyễn Thị Chinh/<br>Phòng Điều dưỡng                           | T03/2020 – T9/2020  | 05 triệu đồng               |
| 3   | ĐD03.2020    | Thời gian phục hồi nhu động ruột sau phẫu thuật đại trực tràng và yếu tố liên quan tại Bệnh viện HN Việt Đức                                                                              | Chu Văn Long/<br>Phòng Điều dưỡng                                                     | T3/2020 – T3/2021   | 05 triệu đồng               |
| 4   | ĐD04.2020    | Đánh giá chất lượng giấc ngủ và các yếu tố ảnh hưởng đến giấc ngủ của người bệnh tại Bệnh viện HN Việt Đức.                                                                               | Lê Sỹ Thoại/<br>Phòng Điều dưỡng                                                      | T02/2020 – T02/2021 | 05 triệu đồng               |
| 5   | ĐD05.2020    | Đánh giá kiến thức và kỹ năng thực hành của điều dưỡng trong sử dụng thang điểm hôn mê Glasgow Coma Scale tại Trung tâm Phẫu thuật Thần kinh, Bệnh viện Hữu nghị Việt Đức                 | Hoàng Bích Ngọc/<br>Khoa PT Thần kinh 2                                               | T01/2020 – T10/2020 | 05 triệu đồng               |
| 6   | ĐD06.2020    | Nghiên cứu thực trạng công tác điều trị giảm đau qua sử dụng thang CPOT trên người bệnh chấn thương sọ não tại phòng Hồi sức, khoa Nội – Hồi sức Thần kinh, Bệnh viện Việt Đức năm 2020   | Dương Minh Đức,<br>Chu Văn Long/<br>Khoa Nội – Hồi sức Thần kinh                      | T2/2020 – T12/2020  | 05 triệu đồng               |
| 7   | ĐD07.2020    | Đánh giá thực trạng công tác chuẩn bị người bệnh trước ghép tim từ người cho đa tạng chết não của điều dưỡng tại khoa Hồi sức tích cực Tim mạch – lồng ngực, bệnh viện Việt Đức năm 2020. | Nguyễn Thị Thu Hà,<br>Nguyễn Xuân Vinh/<br>Khoa Hồi sức tích cực Tim mạch – lồng ngực | T5/2020 – T5/2021   | 05 triệu đồng               |
| 8   | ĐD08.2020    | Đánh giá hiệu quả áp dụng hướng dẫn xử trí tình trạng bí tiểu trên bệnh nhân sau mổ chi dưới tại khoa Điều trị theo yêu cầu – BV Việt Đức.                                                | Nguyễn Bá Anh/<br>Khoa Điều trị theo YC                                               | T01/2020 – T12/2020 | 05 triệu đồng               |
| 9   | ĐD09.2020    | Đánh giá công tác chăm sóc thông tiểu sau mổ cắt bàng quang toàn bộ tại khoa điều trị IC – Bệnh viện Việt Đức.                                                                            | Trần Thị Lụa,<br>Nguyễn Bá Anh/<br>Khoa Điều trị theo YC                              | T01/2020 – T12/2020 | 05 triệu đồng               |
| 10  | ĐD10.2020    | Đánh giá chất lượng cuộc sống ở những bệnh nhân sau phẫu thuật thay khớp gối bằng bộ câu hỏi SF36 và thang đánh giá đau Womac tại bệnh viện Hữu nghị Việt Đức                             | Đinh Quang Chung/<br>Khoa PT Chi trên và YHHT                                         | T3/2020 – T11/2020  | 05 triệu đồng               |



|    |           |                                                                                                                                                                                                                           |                                                                  |                        |               |
|----|-----------|---------------------------------------------------------------------------------------------------------------------------------------------------------------------------------------------------------------------------|------------------------------------------------------------------|------------------------|---------------|
| 11 | ĐD11.2020 | Đánh giá kết quả theo dõi điều trị bảo tồn bệnh nhân chấn thương gan tại khoa Phẫu thuật cấp cứu bụng, Bệnh viện Hữu nghị Việt Đức năm 2020                                                                               | Trần Thu Ngân,<br>Hoàng Thị Lan Anh/<br>Khoa PT cấp cứu bụng     | T4/2020 –<br>T4/2021   | 10 triệu đồng |
| 12 | ĐD12.2020 | Mô tả thực trạng chăm sóc vết thương cho người bệnh phẫu thuật bụng cấp cứu tại khoa Phẫu thuật Cấp cứu bụng, Bệnh viện HN Việt Đức                                                                                       | Ngô Thị Mận,<br>Nguyễn Tiến Hào/<br>Khoa PT Cấp cứu bụng         | T9/2019 –<br>T8/2020   | 05 triệu đồng |
| 13 | ĐD13.2020 | Kết quả chăm sóc người bệnh sau phẫu thuật tán sỏi thận qua da và một số yếu tố liên quan tại khoa Phẫu thuật Tiết niệu                                                                                                   | Nguyễn Thị Thúy Huyền/<br>Khoa PT Tiết niệu                      | T4/2020-<br>T12/2020   | 05 triệu đồng |
| 14 | ĐD14.2020 | Kiến thức và thái độ về quản lý đau sau phẫu thuật của điều dưỡng tại Trung tâm Gây mê và hồi sức ngoại khoa, Bệnh viện HN Việt Đức                                                                                       | Trần Quang Phúc/<br>Khoa Gây mê 1                                | T5/2020 –<br>T8/2020   | 05 triệu đồng |
| 15 | ĐD15.2020 | Đánh giá hiệu quả của thực hiện quy định 5S quản lý tủ thuốc tại khoa Gây mê 2 năm 2020                                                                                                                                   | Trần Văn Thùy,<br>Phạm Thị Ngoan/<br>Khoa Gây mê 2               | T4/2020 –<br>T9/2020   | 05 triệu đồng |
| 16 | ĐD16.2020 | Đánh giá kết quả chăm sóc điều dưỡng và các tác dụng không mong muốn của phương pháp giảm đau ngoài màng cứng đối với người bệnh sau mổ vùng bụng tại Trung tâm Gây mê và Hồi sức ngoại khoa, Bệnh viện Hữu nghị Việt Đức | Vũ Thị Hằng,<br>Nguyễn Thị Thiện/<br>Khoa Gây mê 2               | T5/2020 –<br>T5/2021   | 05 triệu đồng |
| 17 | ĐD17.2020 | Đánh giá kết quả thực hiện cải tiến trong phòng ngừa và chăm sóc loét tỳ đè của điều dưỡng khoa Hồi sức tích cực 1 năm 2020                                                                                               | Lại Thanh Nga,<br>Nguyễn Văn Thanh/<br>Khoa Hồi sức tích cực 1   | T3/2020 –<br>T3/2021   | 05 triệu đồng |
| 18 | ĐD18.2020 | Đánh giá thực trạng chăm sóc bóng chèn ống NKQ, MKQ trên người bệnh thở máy tại khoa Hồi sức tích cực 1                                                                                                                   | Nguyễn Đức Dưỡng,<br>Nguyễn Đức Tiến/<br>Khoa Hồi sức tích cực 1 | T3/2020 –<br>T3/2021   | 05 triệu đồng |
| 19 | ĐD19.2020 | Thực trạng chăm sóc ống thông dạ dày và một số yếu tố liên quan trên người bệnh nặng tại khoa Hồi sức tích cực 2 năm 2020                                                                                                 | Khang Thị Diên,<br>Dương Thị Thanh/<br>Khoa Hồi sức tích cực 2   | T4/2020 –<br>T8/2020   | 05 triệu đồng |
| 20 | ĐD20.2020 | Đánh giá hiệu quả kỹ thuật đặt huyết áp động mạch xâm lấn dưới hướng dẫn siêu âm ở bệnh nhân phù.                                                                                                                         | Nguyễn Trường Giang/<br>Khoa Hồi sức tích cực 2                  | T02/2020 –<br>T10/2020 | 05 triệu đồng |
| 21 | ĐD21.2020 | Đánh giá tình trạng nhiễm khuẩn tiết niệu ở người bệnh được hồi sức thở máy có đặt thông tiểu tại khoa Hồi sức tích cực Bệnh viện HN Việt Đức                                                                             | Lê Thị Huệ/<br>Khoa Hồi sức tích cực 2                           | T4/2020 –<br>T12/2020  | 05 triệu đồng |
| 22 | ĐD22.2020 | Đánh giá hiệu quả dinh dưỡng sớm đường miệng trên bệnh nhân phẫu thuật ung thư đại tràng tại khoa Ung bướu Bệnh viện HN Việt Đức năm 2020.                                                                                | Trần Thị Ngọc/<br>Khoa Ung bướu                                  | T01/2020 –<br>T12/2020 | 10 triệu đồng |



|    |           |                                                                                                                                                         |                                                                      |                        |               |
|----|-----------|---------------------------------------------------------------------------------------------------------------------------------------------------------|----------------------------------------------------------------------|------------------------|---------------|
| 23 | ĐD23.2020 | Ứng dụng điện thoại thông minh trong theo dõi vật vi phẫu.                                                                                              | Nguyễn Ngân Giang/<br>Khoa PT Hàm mắt – Tạo hình<br>– Thăm mỹ        | T4/2020-<br>T3/2021    | 05 triệu đồng |
| 24 | ĐD24.2020 | Thực trạng kiểm soát đau sau mổ trĩ và sự hài lòng của người bệnh tại Trung tâm Phẫu thuật Đại trực tràng – tăng sinh môn                               | Vũ Thị Hồng,<br>Phạm Thị Thanh Huyền/<br>TT PT Đại trực tràng và TSM | T01/2020 –<br>T10/2020 | 05 triệu đồng |
| 25 | ĐD25.2020 | Đánh giá chất lượng cuộc sống bệnh nhân sau điều trị phẫu thuật đau nửa mặt và co giật nửa mặt                                                          | Nguyễn Thị Ngân,<br>Dương Đại Hà/<br>Khoa PT Thần kinh 1             | T4/2020 –<br>T4/2021   | 10 triệu đồng |
| 26 | ĐD26.2020 | Khảo sát thực trạng chăm sóc và điều trị người bệnh chấn thương sọ não nặng sau khi ra viện                                                             | Hồ Thị Quỳnh Nga,<br>Đồng Văn Hệ/<br>Khoa PT Thần kinh 1             | T5/2020 –<br>T5/2021   | 10 triệu đồng |
| 27 | ĐD27.2020 | Gánh nặng chăm sóc của gia đình người bệnh bị chấn thương sọ não tại khoa PT Thần kinh 1, Bệnh viện HN Việt Đức năm 2020 và một số yếu tố liên quan     | Phạm Thị Sơn/<br>Khoa PT Thần kinh 1                                 | T4/2020 –<br>T4/2021   | 05 triệu đồng |
| 28 | ĐD28.2020 | Đánh giá kiến thức của điều dưỡng và thực trạng chăm sóc dẫn lưu vùng cột sống thắt lưng tại khoa Phẫu thuật thần kinh 1, BV Hữu nghị Việt Đức năm 2020 | Trần Thị Thúy Ngân/<br>Khoa PT Thần kinh 1                           | T02/2020 –<br>T02/2021 | 05 triệu đồng |
| 29 | ĐD29.2020 | Khảo sát lý do người bệnh chọn khám tại khoa Phẫu thuật Thần kinh, bệnh viện Hữu nghị Việt Đức                                                          | Nguyễn Thị Xuân Mai,<br>Đồng Văn Hệ/<br>Khoa PT Thần kinh 1          | T5/2020 –<br>T5/2021   | 05 triệu đồng |
| 30 | ĐD30.2020 | Mức độ lo âu, căng thẳng của người bệnh trước mổ u não                                                                                                  | Nguyễn Thị Thảo/<br>Khoa PT Thần kinh 1                              | T3/2020-<br>T9/2020    | 05 triệu đồng |

GIÁM ĐỐC

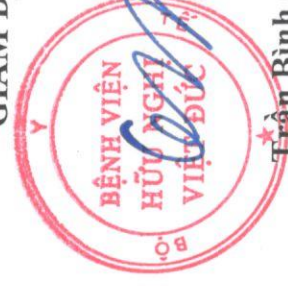

Trần Bình Giang
